# Supplementary material for: Newly developed electrochemical synthesis of Co-based layered double hydroxides: toward noble metal-free electro-catalysis
Source: Royal Society of Chemistry journal article supplement (doi:10.1039/c8ta11812d), 2019-01-01
Supplement: c8ta11812d1.pdf [file c8ta11812d1.pdf]

## Supplementary information

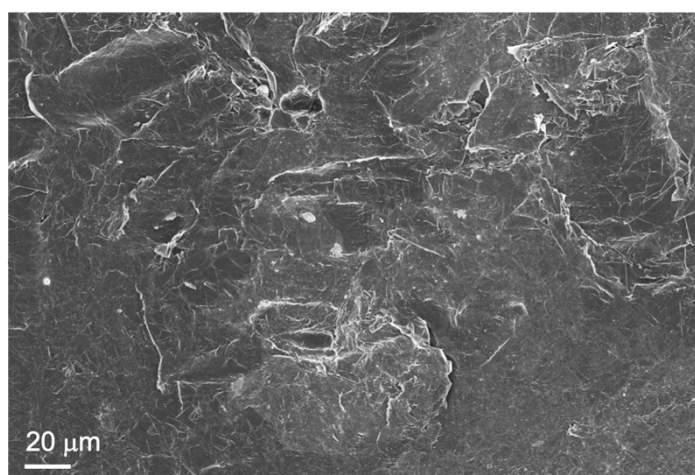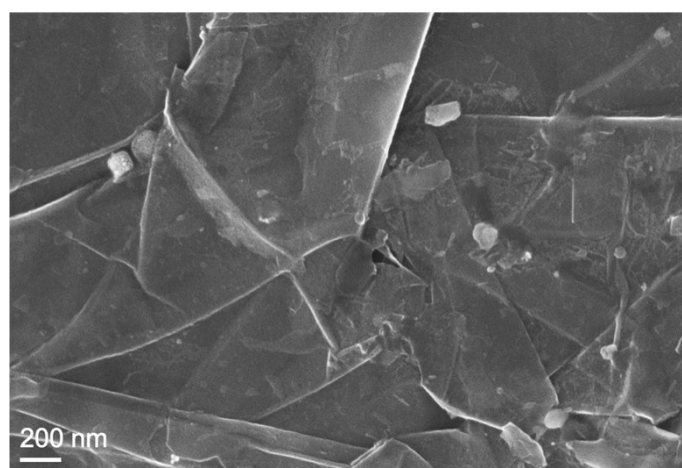

SI 1: Grafoil images at different magnifications

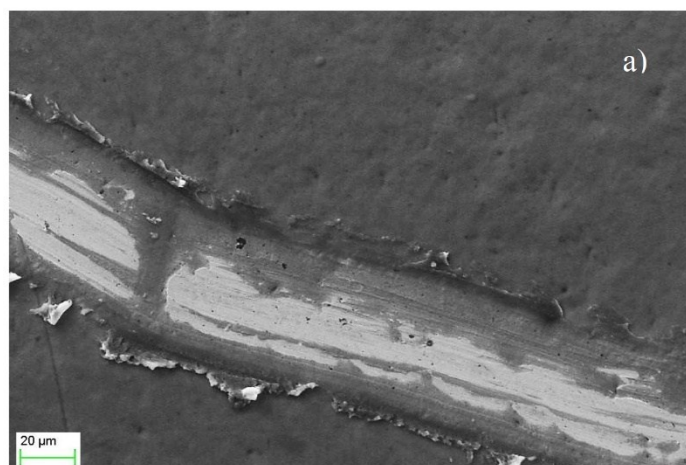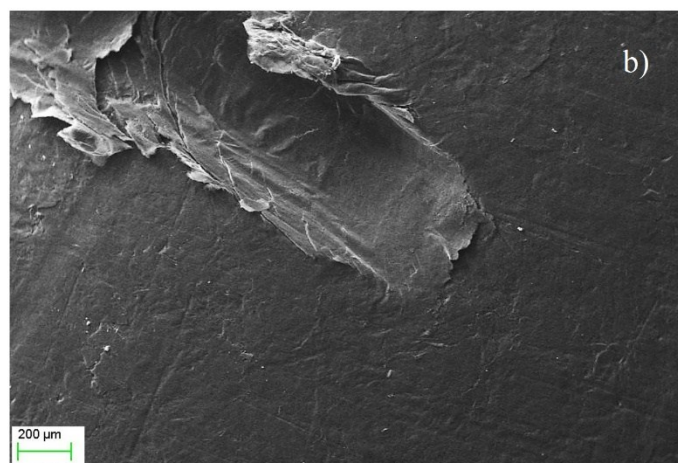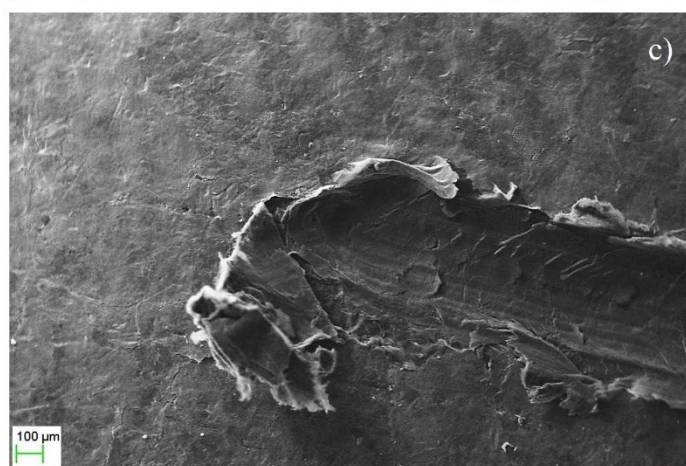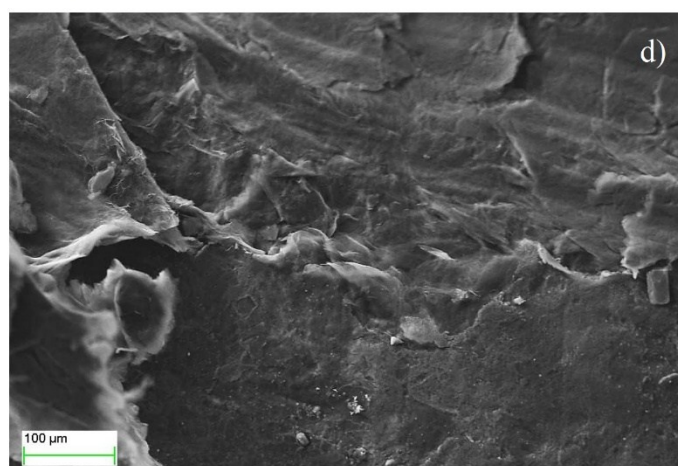

SI 2: SEM images of scratch tracks of a) Pt coated surface, b) Grafoil surface c-d) Grafoil coated electrodes at different magnifications.

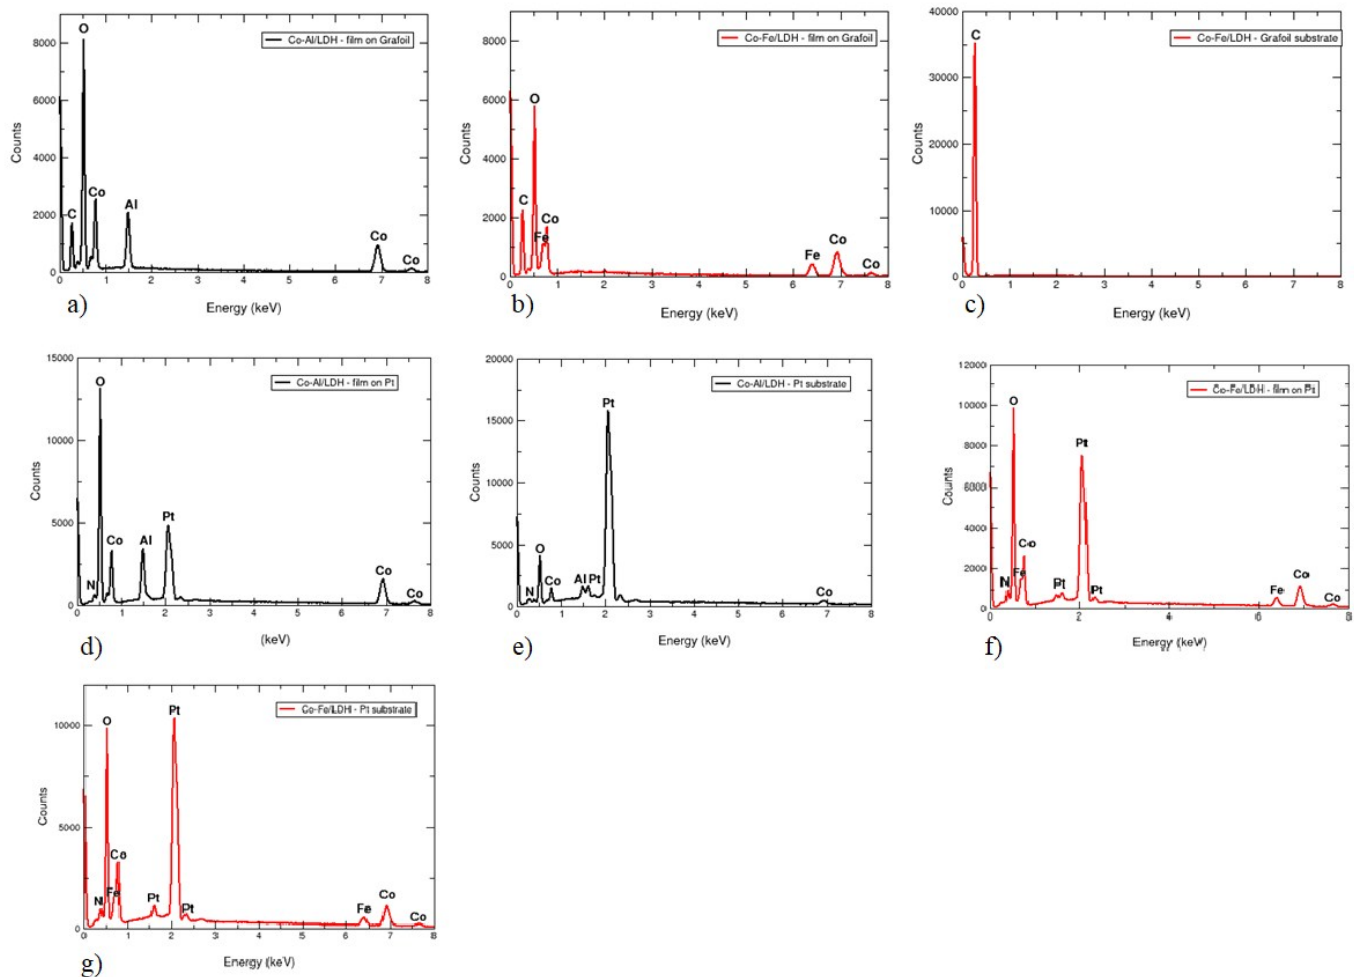

SI 3: EDX analysis. Concerning the possibility to distinguish the products and supports, EDX spectroscopy has been carried out, but instead of a detailed mapping, single areas of different thickness have been analysed. From a general point of view, the EDX measurements confirm the composition of the film, made by Co and Al, and Co and Fe, respectively, both on Pt and Grafoil substrates. For Grafoil substrates (a-c), when the film exposes part of the substrate, as in the right part of Fig. 3h, the EDX indicates the presence of C only. For the Co-Al/LDH samples on the Pt substrates (d-g), as the films cover uniformly the substrates, and because of the high scattering power of Pt, it is not possible to obtain spectra of the substrate only. When the film shows thinner regions, the contribution of the substrate becomes predominant. Finally, for the Co-Fe/LDH samples on Pt substrates, the comparison between the spectra acquired on the nanostructures shown in Figs. 3e and 3f and on the exposed substrates, that are showing again a higher concentration of Pt, confirms the composition of the products.

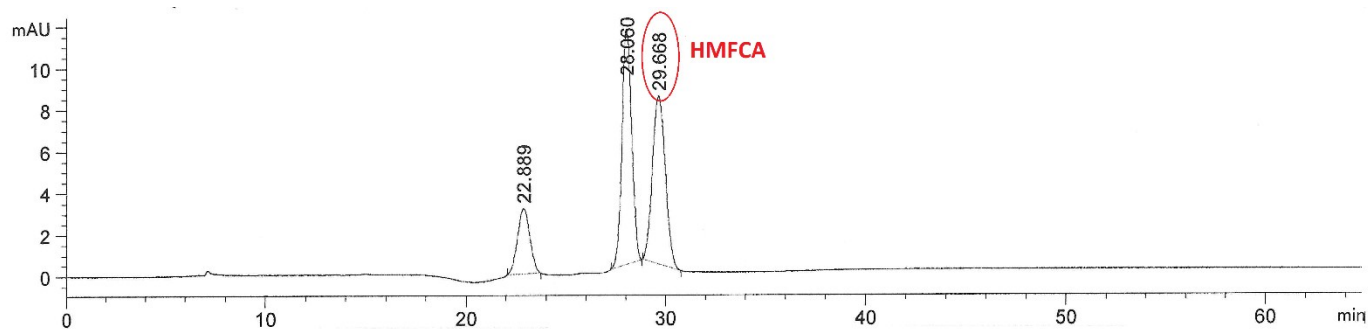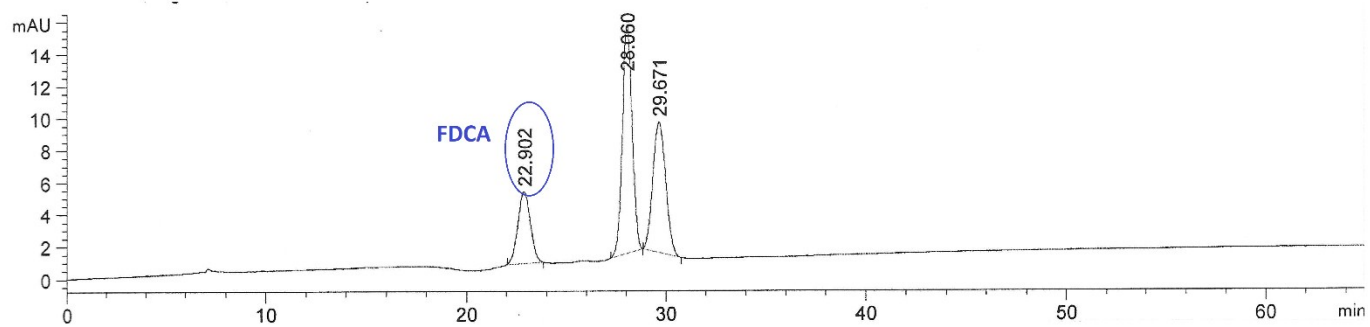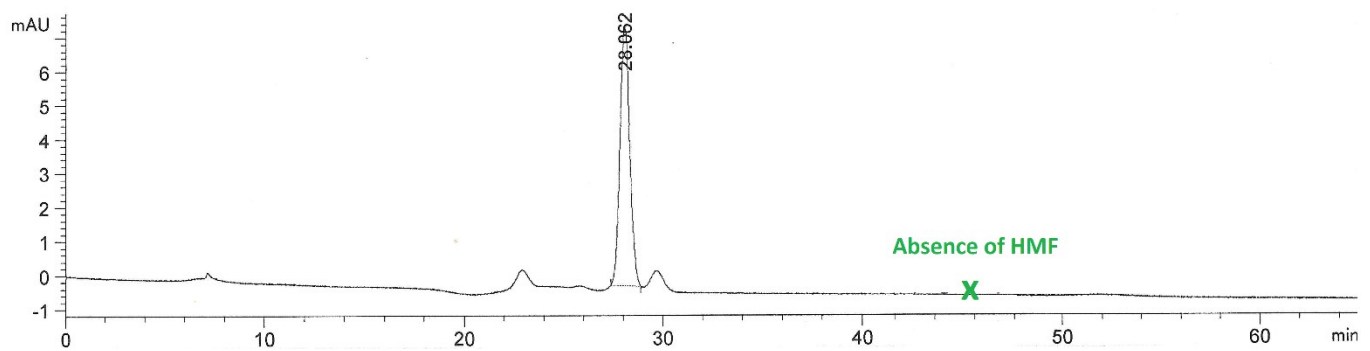

SI 4: HPLC analysis of electro-oxidation of HMF

Solvent: cd3cn  
 Temp. 25.0 C / 298.1 K  
 Operator: lunazzi  
 File: elisa-1H-CD3CN  
 Mercury-400BB "m400"

Relax. delay 1.000 sec  
 Pulse 45.0 degrees  
 Acq. time 2.733 sec  
 Width 6398.0 Hz  
 16 repetitions  
 OBSERVE H1, 399.9266912 MHz  
 DATA PROCESSING  
 FT size 65536  
 Total time 1 min, 9 sec

**\* HMFA**

**# FDCA**

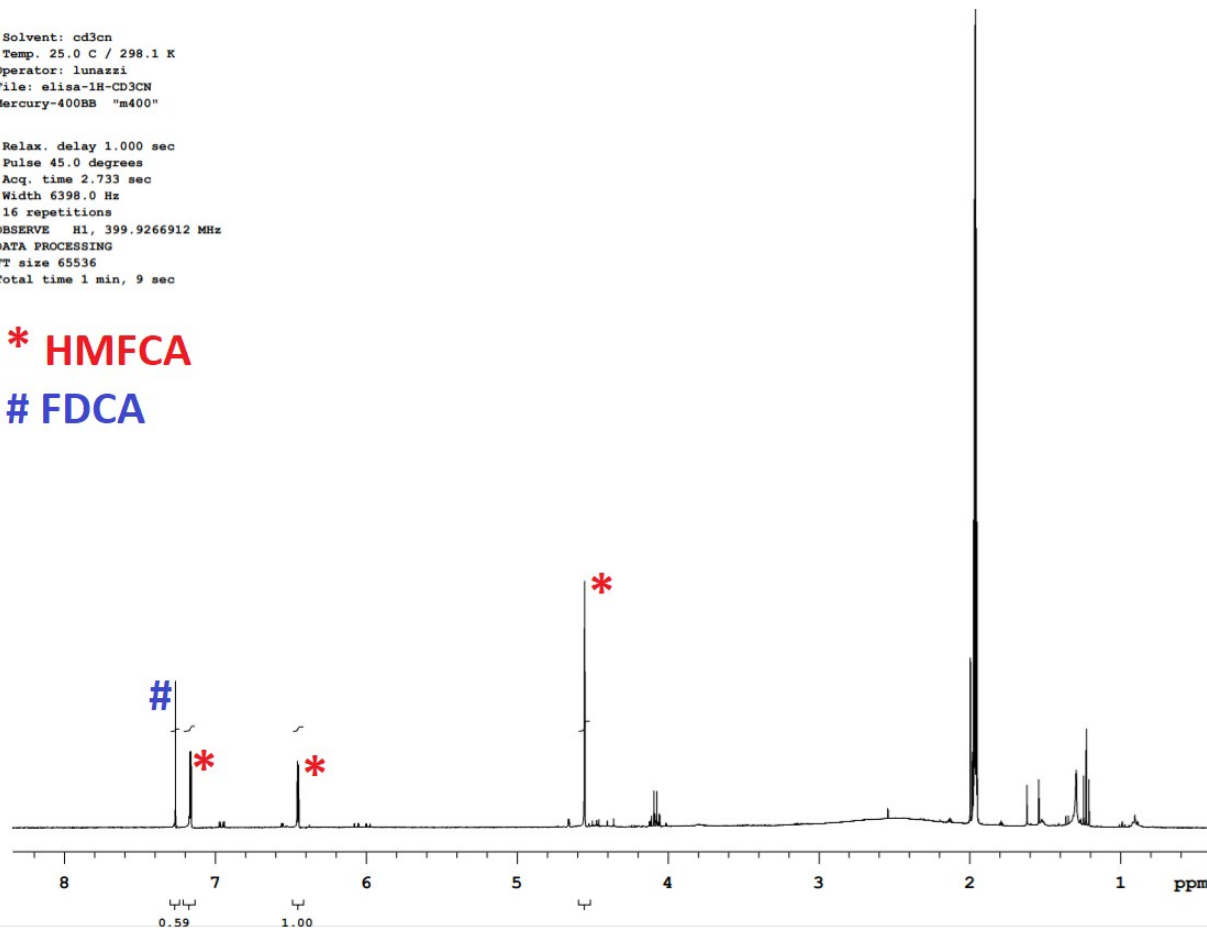

SI 5: 1HNMR of mixture of HMFA and FDCA

Relax. delay 1.000 sec  
 Pulse 45.0 degrees  
 Acq. time 2.733 sec  
 Width 6398.0 Hz  
 16 repetitions  
 OBSERVE H1, 399.9245741 MHz  
 DATA PROCESSING  
 Sq. sine bell 2.733 sec  
 Shifted by -2.733 sec  
 FT size 131072  
 Total time 1 min, 9 sec

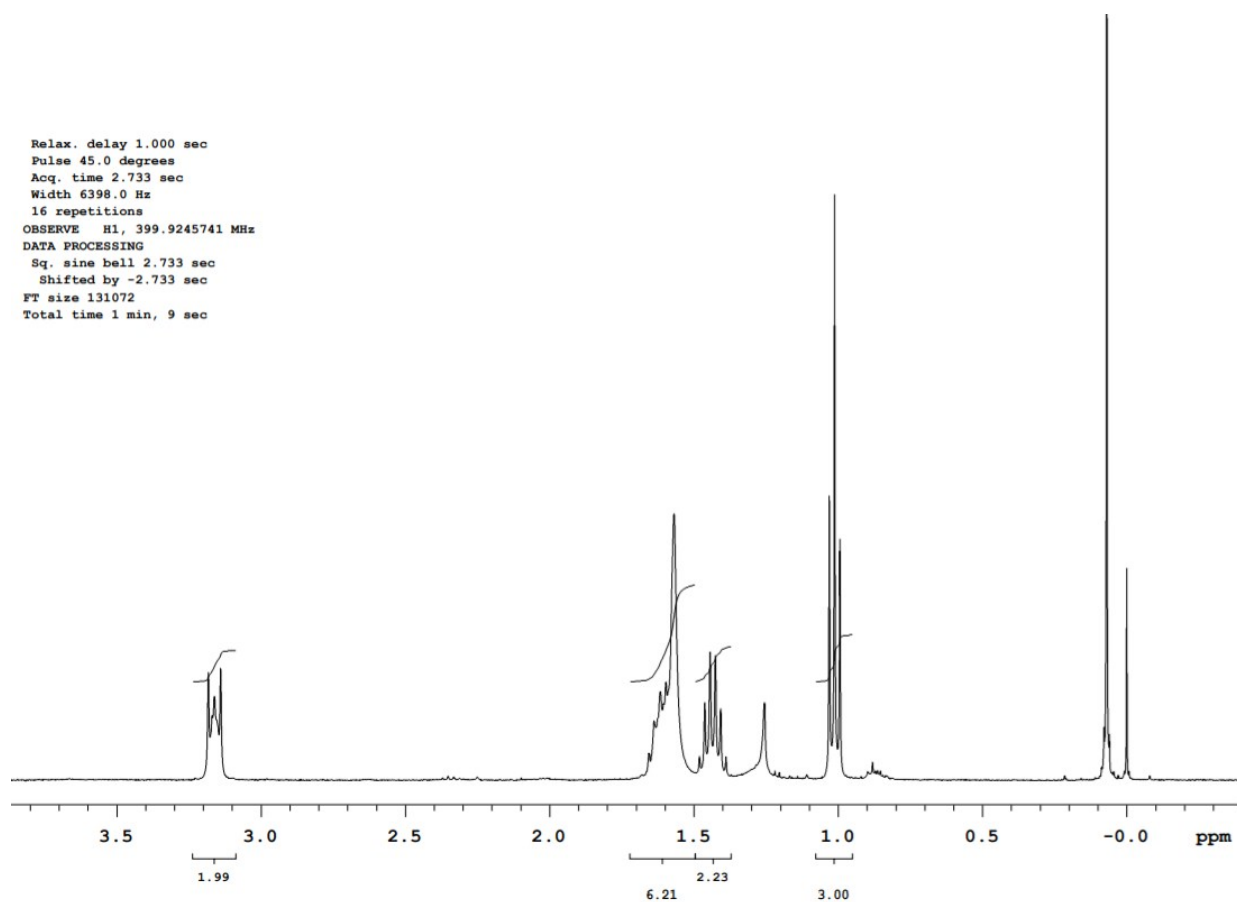

SI 6: HNMR of unidentified aliphatic product.

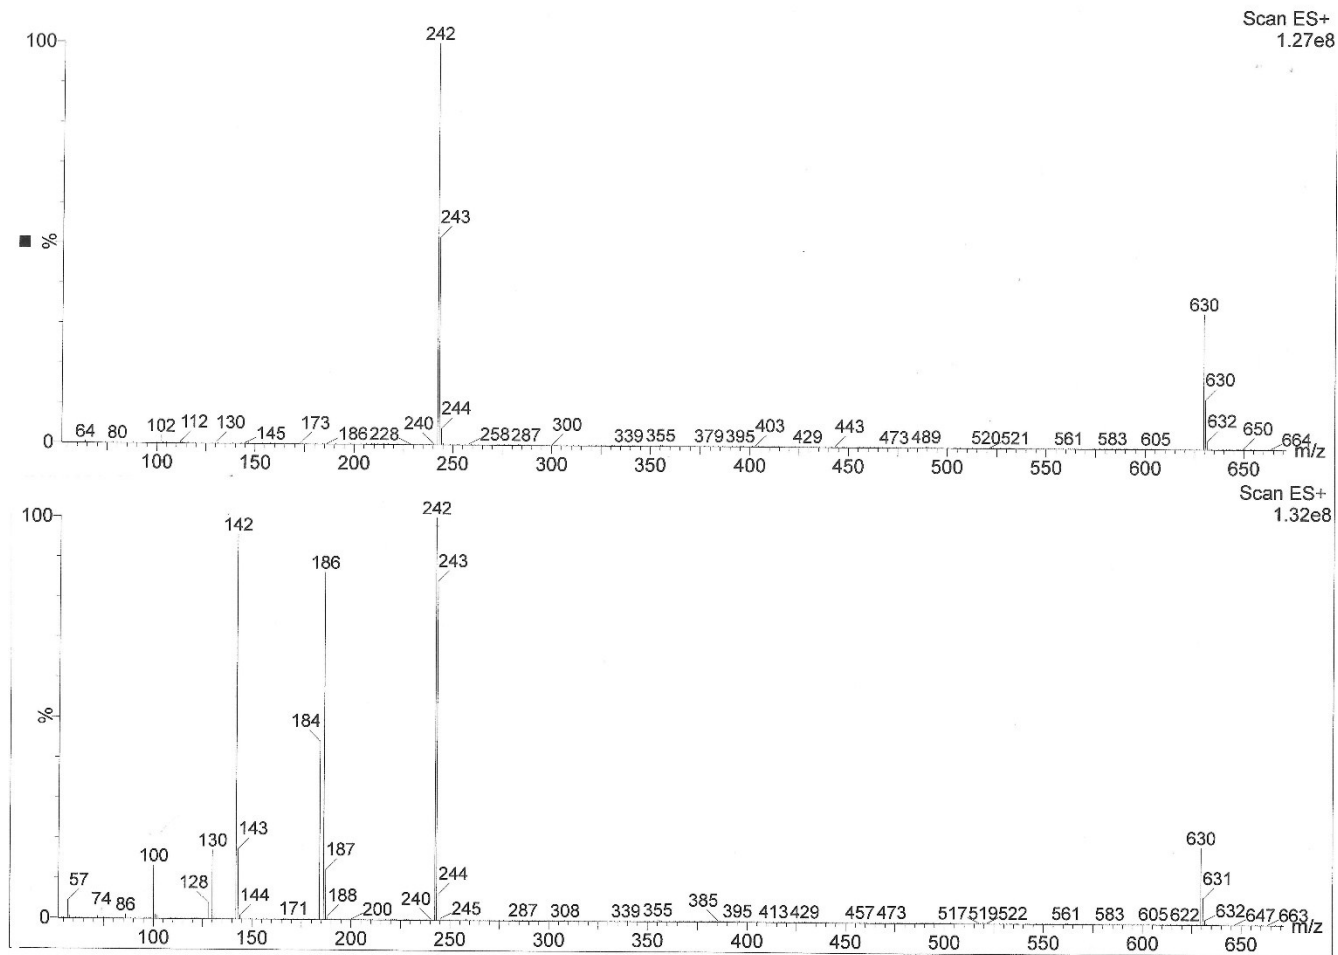

SI 7: ESI-MS of unidentified aliphatic product
